# Supplementary material for: Lymphangioleiomyomatosis Biomarkers Linked to Lung Metastatic Potential and Cell Stemness
Source: PLoS One. 2015 Jul 13;10(7):e0132546. doi: 10.1371/journal.pone.0132546 (PMC4500593; doi:10.1371/journal.pone.0132546)
Supplement: S1 Table — Clinical data and immunohistochemical results for ALDH1, CD61, FSCN1, ID1, pS6, and SOX9. (XLSX) [file pone.0132546.s001.xlsx]

## Sheet: Patients and results
S1 Table. LAM patients and immunohistochemical results.
Sample ID	ALDH1 score	CD61 score	FSCN1 score	ID1 score (major sublocalization)	pS6 score	SOX9 score (major sublocalization)	Year of birth	First symptom	First symptom year	All symphtoms	Pneumothorax (n)	Chylothorax	Diagnosis	Lung transplant (year)	Angiomyolipomas/myomas	Treatment received	Previous smoker
AELAM-1	2	0	1	1 (cytoplasmic)	2	1 (cytoplasmic)	1964	Dyspnea	1999	Dyspnea progressive	0	Yes	LAM sporadic	Yes (2003)	Unknown	Progesterone, pocegip, decapeptyl, oophorectomy	No
AELAM-2	1	1	1	2 (cytoplasmic)	1	0	1977	Cough	2000	Cough	0	No	LAM sporadic	No	Unknown	None	Yes
AELAM-3	3	0	1	1 (cytoplasmic)	1	0	1962	Dyspnea	2005	Dyspnea	0	Yes (post-trasplant)	LAM sporadic	Yes (2011)	Retroperitoneal	None	Yes
AELAM-4	0	2	1	3 (cytoplasmic)	3	1 (cytoplasmic)	1951	Dyspnea	1994	Pneumothorax, dyspnea progressive	1	Yes	Unknown	Yes (2001)	Unknown	Progesterone, tamoxifen	No
AELAM-5	1	NA	1	1 (cytoplasmic)	1	0	1956	Hemoptysis	1999	Hemoptysis	0	No	LAM sporadic	Yes (2011)	Unknown	Hysterectomy, oophorectomy	No
AELAM-6	2	1	1	2 (nuclear)	1	1 (nuclear)	1954	Pneumothorax, dyspnea, fatigue	1993	Pneumothorax, dyspnea, fatigue, cough, severe respiratory insufficiency	5	No	LAM sporadic	Yes (2005)	Unknown	Oxigen, progesterone, bronchodilators, corticosteroids	No
AELAM-7	1	1	2	1 (cytoplasmic)	1	0	1972	Fatigue, legs pain	2004	Pneumothorax, dyspnea	6	No	LAM sporadic	Yes (2006)	Retroperitoneal, uterine	Progesterone	No
AELAM-8	1	NA	2	1 (cytoplasmic)	1	1 (cytoplasmic)	1967	Pneumothorax, dyspnea	1993	Pneumothorax, dyspnea	4	No	LAM sporadic	Yes (2007)	Unknown	Progesterone	Yes
AELAM-9	3	2	2	2 (cytoplasmic)	1	0	1964	Pneumothorax, dyspnea	1995	Pneumothorax, dyspnea progressive	2	Yes	LAM sporadic	Yes (2005)	Unknown	Progesterone, oophorectomy	No
AELAM-10	NA	0	NA	NA	1	1 (nuclear)	1962	Dyspnea	2002	Dyspnea	0	No	LAM sporadic	Yes (2005)	Unknown	None	No
AELAM-11	1	1	1	1 (nuclear)	1	1 (nuclear)	1969	Cough	2011	Pneumothorax, dyspnea, cough, fatigue, thorax pain	1	No	LAM sporadic	No	Renal	None	No
AELAM-12	1	3	1	2 (cytoplasmic)	1	2 (cytoplasmic)	1952	Pneumothorax	1998	Pneumothorax, dyspnea	4	No	LAM sporadic	Yes (2003)	Unknown	Progesterone	No
AELAM-13	3	0	1	1 (cytoplasmic)	2	1 (nuclear)	1969	Dyspnea	2005	Dyspnea	0	No	LAM sporadic	Yes (2012)	Unknown	None	No
AELAM-14	2	0	2	2 (cytoplasmic)	2	1 (cytoplasmic)	1944	Dyspnea	1995	Dyspnea, hemoptysis	0	No	LAM sporadic	Yes (2008)	Unknown	Progesterone	No
AELAM-15	1	0	2	3 (nuclear)	3	1 (nuclear)	1964	Hemoptysis	2004	Pneumothorax, dyspnea, hemoptysis	4	Yes	LAM sporadic	Yes (2006)	Retroperitoneal	Progesterone (medroxyprogesterone acetate), formoterol	No
AELAM-16	2	2	3	2 (cytoplasmic)	1	1 (cytoplasmic)	1954	Dyspnea	1990	Dyspnea, hemoptysis	2	No	LAM sporadic	Yes (1992)	Unknown	Progesterone	Yes
AELAM-17	3	2	3	2 (cytoplasmic)	1	1 (cytoplasmic)	1969	Pneumothorax	2001	Pneumothorax, dyspnea	3	Yes	LAM sporadic	Yes (2003)	Unknown	None	No
AELAM-18	1	2	1	1 (nuclear)	2	2 (nuclear)	1967	Dyspnea, fatigue	2009	Dyspnea, fatigue, bronquial hyperactivity	0	No	LAM sporadic	No	Unknown	Rapamycin, bronchodilators	No
AELAM-19	0	2	1	1 (cytoplasmic)	1	1 (cytoplasmic)	1962	Dyspnea	1987	Pneumothorax, dyspnea progressive	2	No	LAM sporadic	Yes (2000)	Unknown	Progesterone	Yes
AELAM-20	1	1	3	3 (cytoplasmic)	2	2 (cytoplasmic)	1950	Dyspnea	1987	Pneumothorax, dyspnea progressive	2	No	LAM sporadic	Yes (1999)	Liver	Progesterone, hysterectomy,adnexectomy double	Yes
AELAM-21	1	NA	1	3 (cytoplasmic)	NA	NA	1958	Pneumothorax	2006	Pneumothorax, dyspnea	1	No	LAM sporadic	No	Unknown	Oxigen, rapamycin, decapeptyl	No
AELAM-22	1	0	1	1 (cytoplasmic)	1	1 (cytoplasmic)	1976	Pneumothorax, dyspnea	2012	Pneumothorax, dyspnea	3	No	LAM sporadic	No	Retroperitoneal	Rapamycin	Yes
AELAM-23	1	NA	1	1 (cytoplasmic)	2	1 (nuclear)	1966	Dyspnea, fatigue	2011	Dyspnea, fatigue	0	No	LAM sporadic	No	Unknown	None	Yes
